# Supplementary material for: Natural-like Chalcones with Antitumor Activity on Human MG63 Osteosarcoma Cells
Source: MDPI journal article supplement (doi:10.3390/molecules27123751), 2022-06-11

## Supplementary Material

### Natural-like chalcones with antitumor activity on human MG63 osteosarcoma cells

Martina Rossi,<sup>1</sup> Concettina Cappadone,<sup>1</sup> Giovanna Picone,<sup>1</sup> Alessandra Bisi,<sup>2</sup> Giovanna Farruggia,<sup>1</sup>  
Federica Belluti,<sup>2</sup> Paolo Blasi,<sup>1</sup> Silvia Gobbi,<sup>2</sup> Emil Malucelli<sup>1</sup>

*Department of Pharmacy and Biotechnology, Alma Mater Studiorum-University of Bologna* <sup>1</sup>*Via San Donato 19/2, 40127, Bologna, Italy* <sup>2</sup>*Via Belmeloro 6, 40126, Bologna, Italy*

### Contents

|                                                                           |    |
|---------------------------------------------------------------------------|----|
| Figures S1 and S2                                                         | S2 |
| <sup>1</sup> H- and <sup>13</sup> C-NMR spectra of compounds 1g, 1i, 1k-s | S3 |

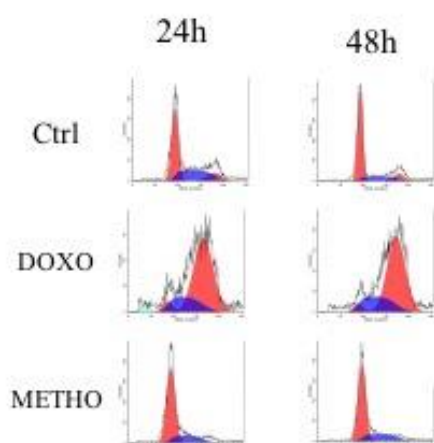

**Figure S1. Cell cycle analysis.** Cell cycle analysis after 24 or 48 h of treatment with doxorubicin and methotrexate at 0.5 and 0.1  $\mu\text{M}$  respectively. Histograms show a representative experiment of the distribution of cell cycle phase.

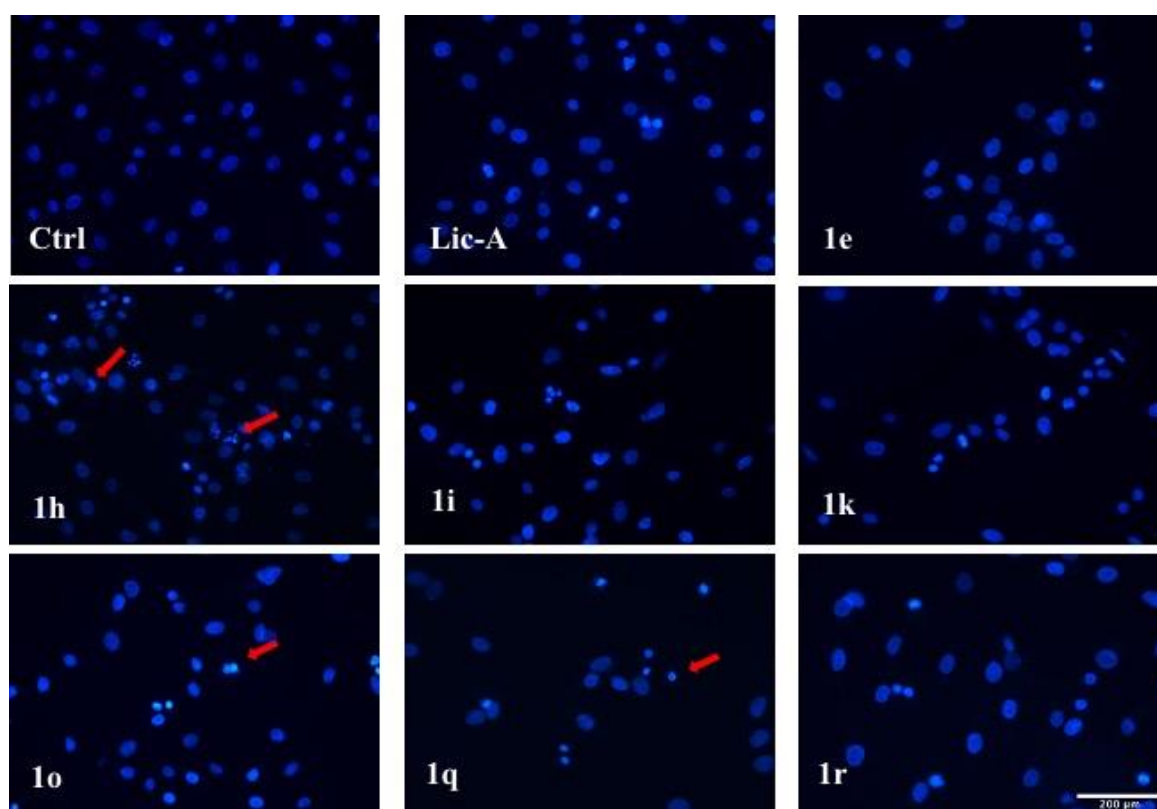

**Figure S2. Effects of Lic-A analogs on cell morphology in MG63 cells.** Fluorescence microscopy of control and treated cells with  $\text{IC}_{50}$  dose for 24 h. Nuclei are stained in blue with Hoechst. The arrows indicated the fragmented and pycnotic nuclei and condensed chromatin. Scale bar 200  $\mu\text{m}$ .

**$^1\text{H}$ - and  $^{13}\text{C}$ -NMR spectra of compounds 1g, 1i, 1k-s**

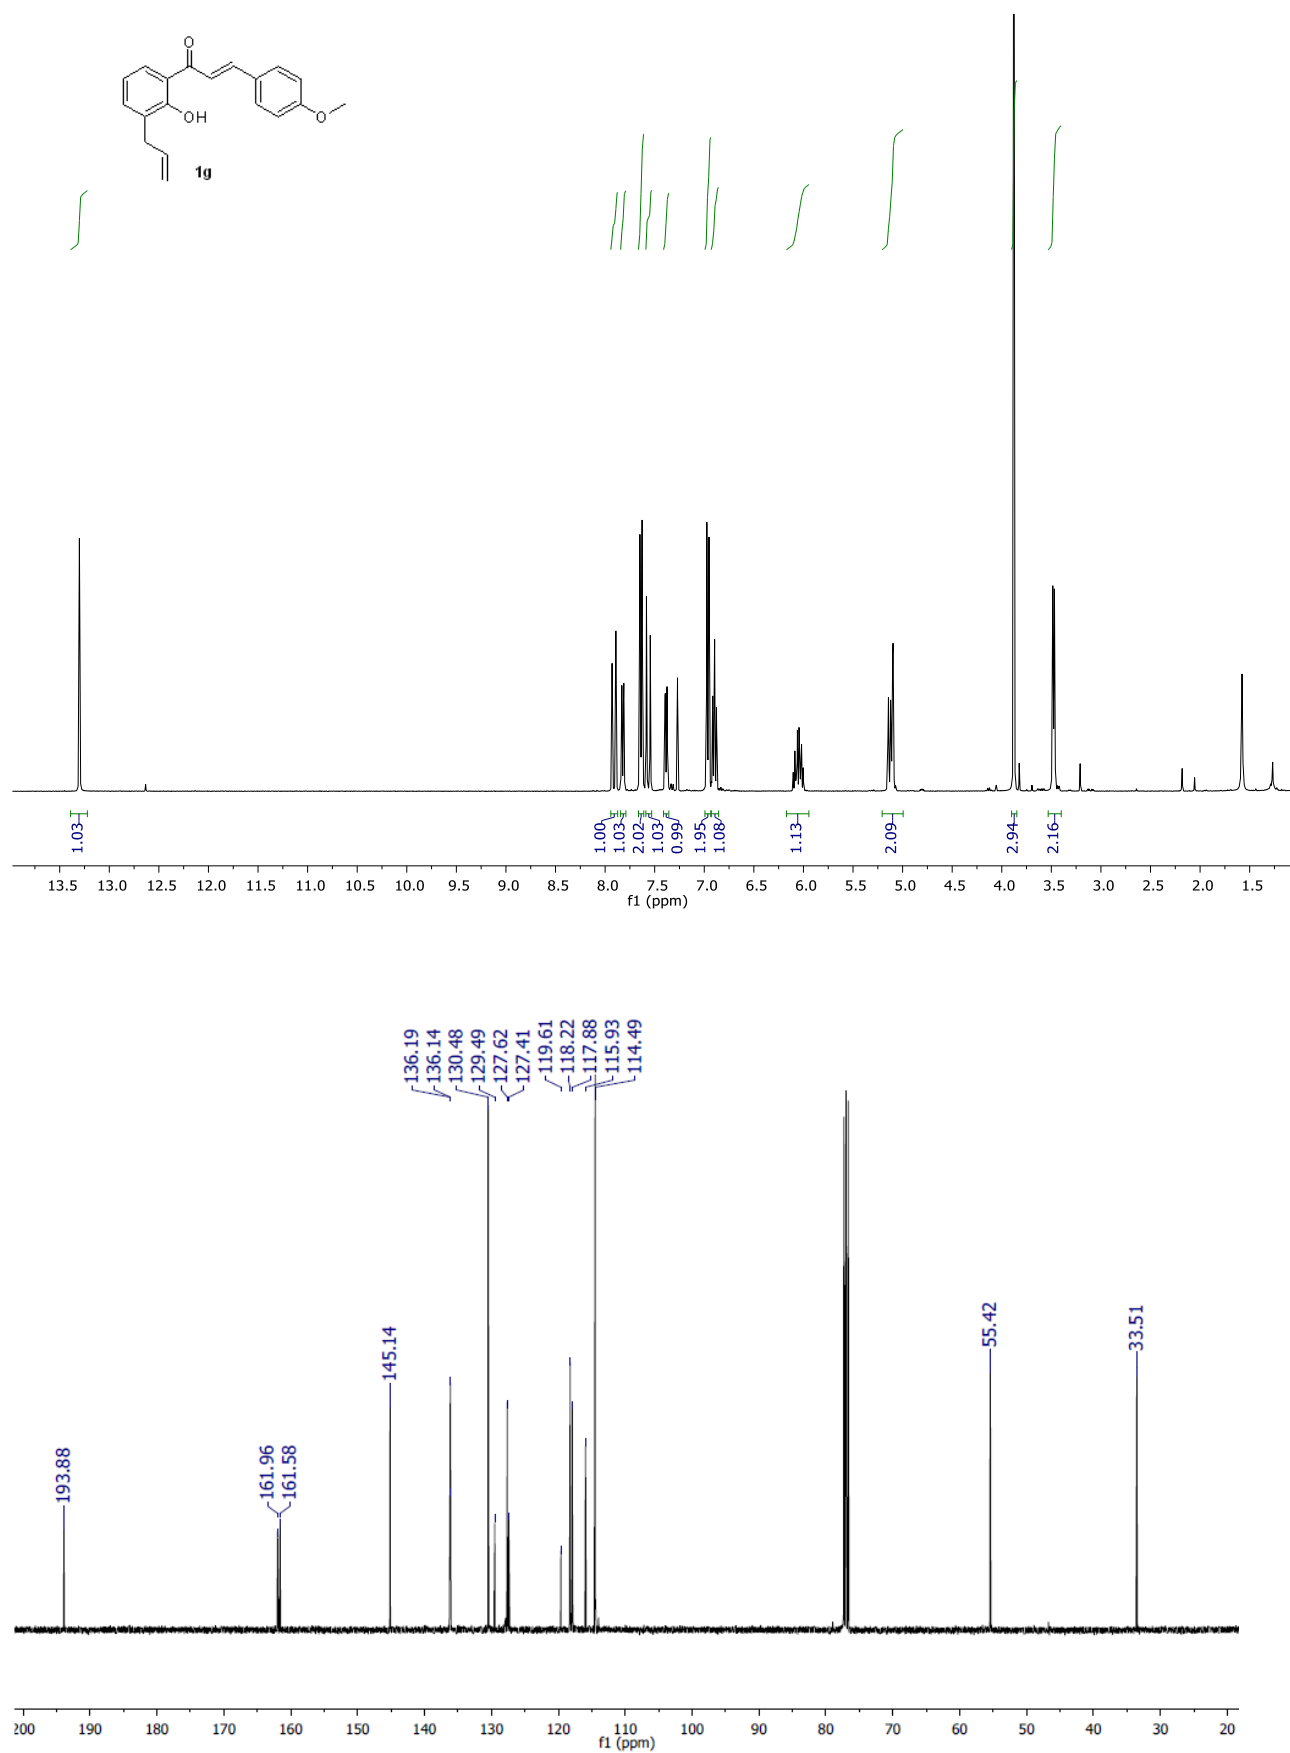

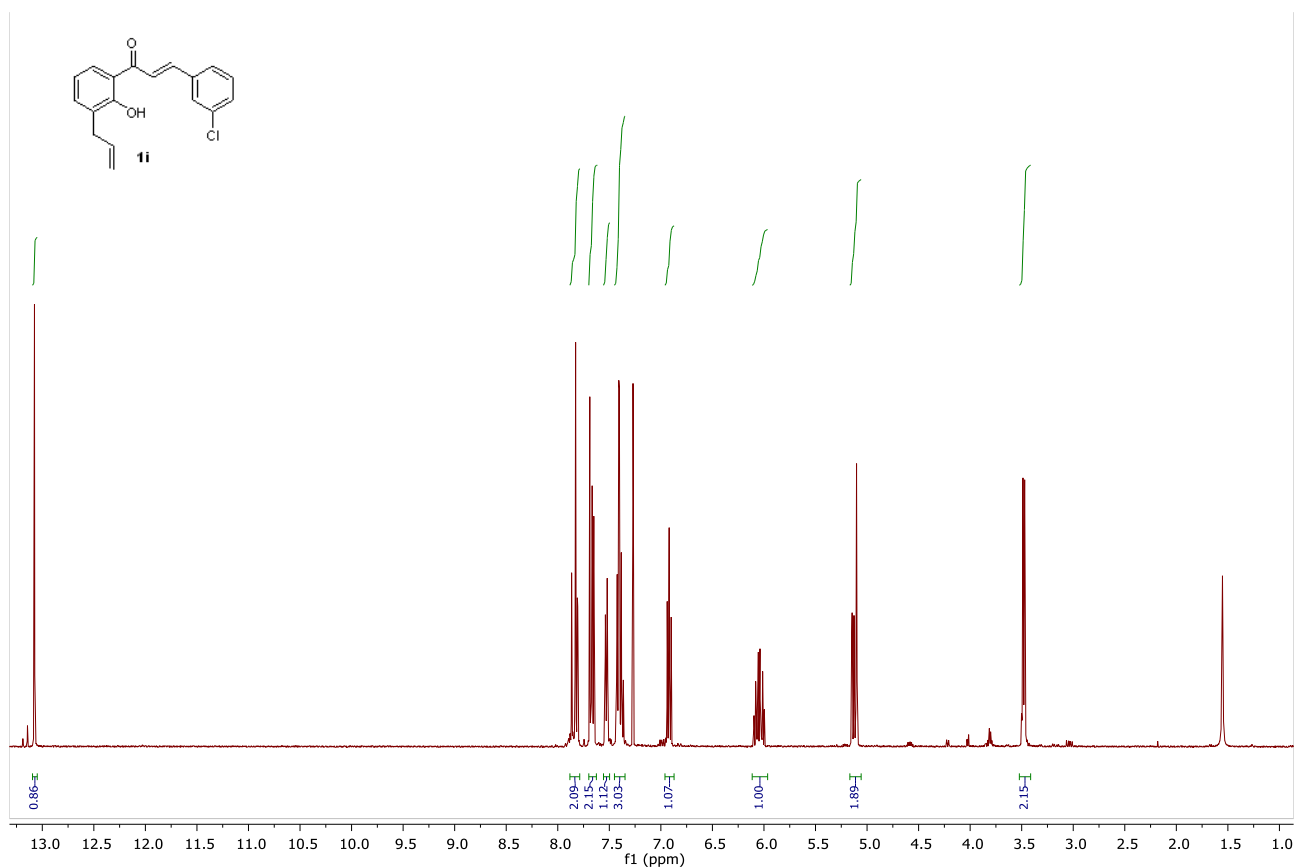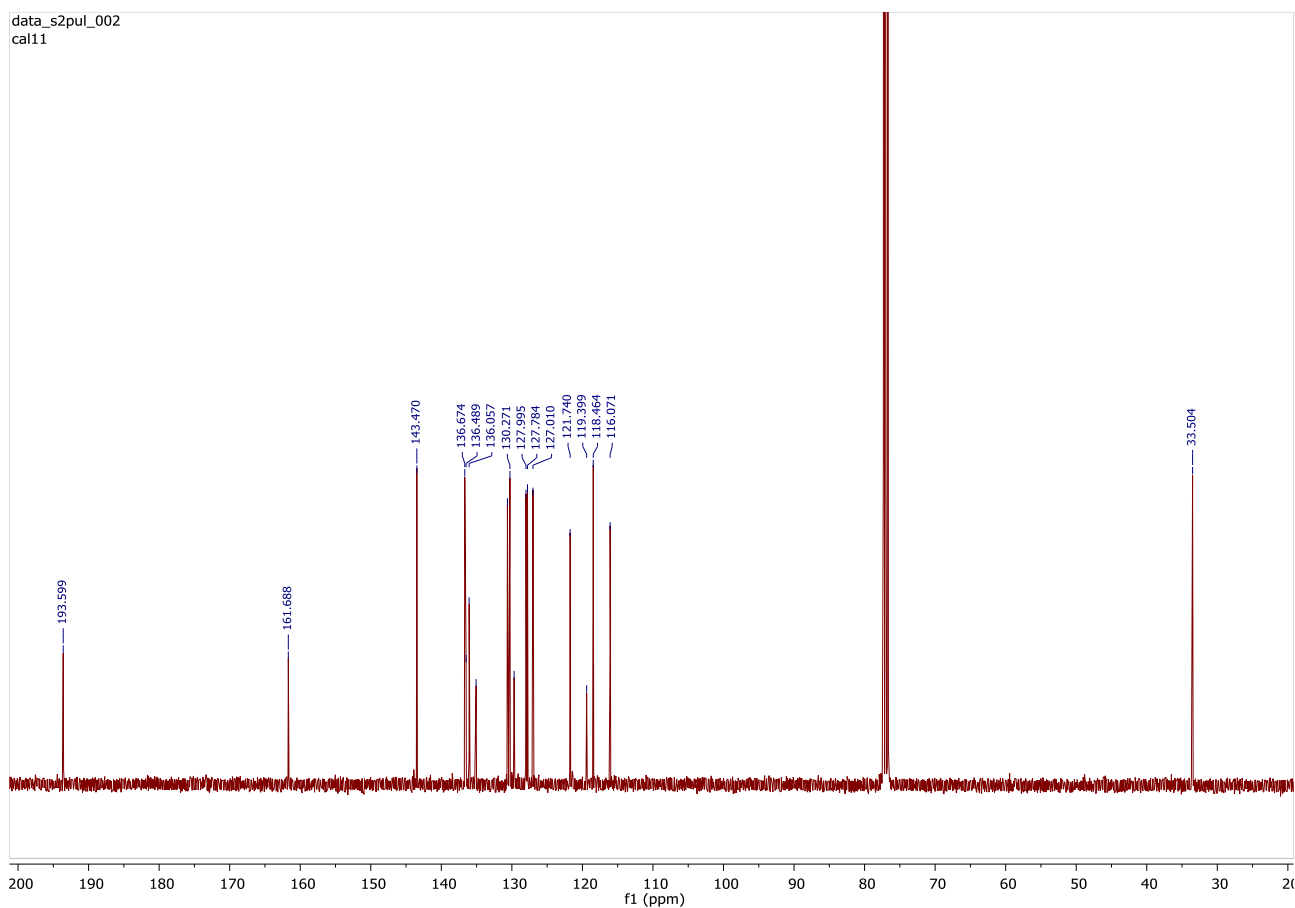

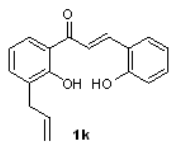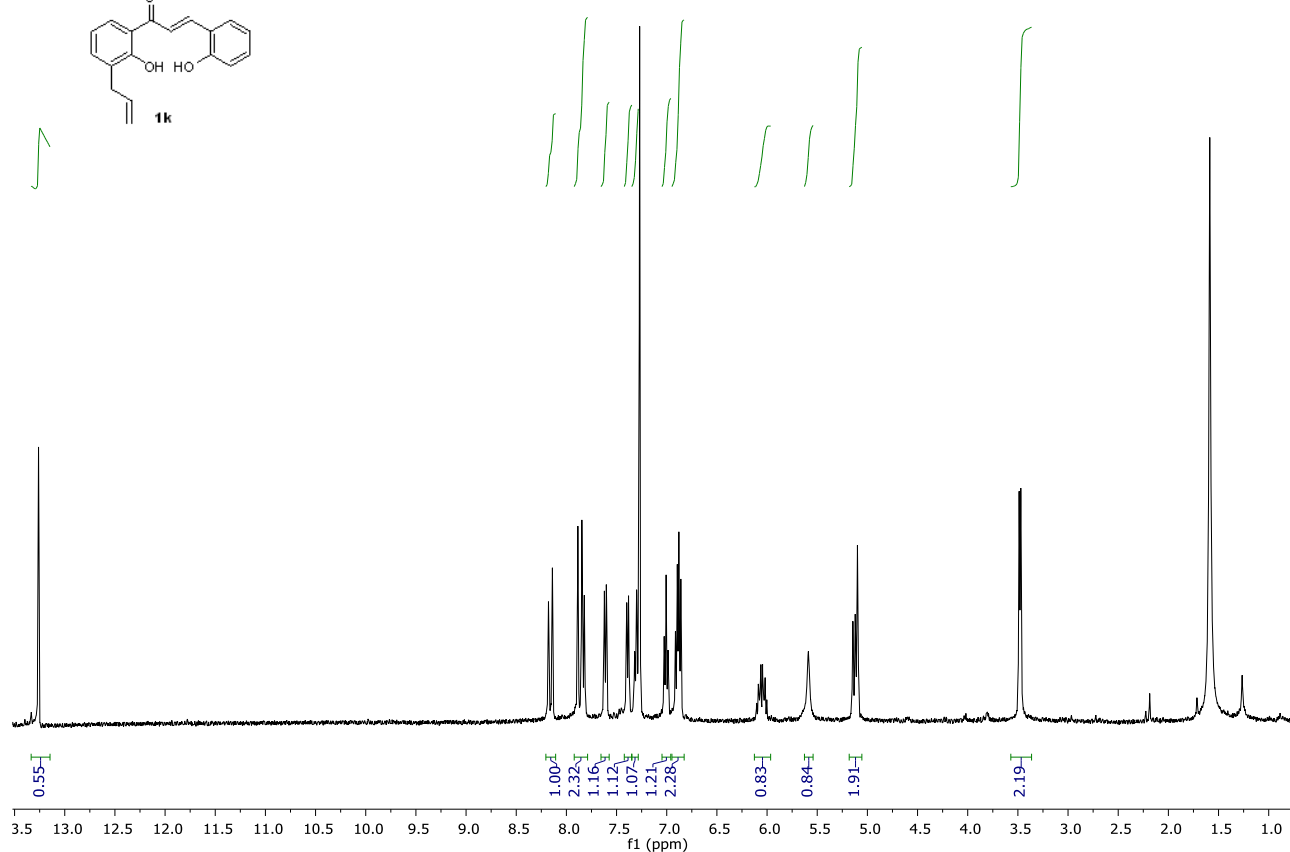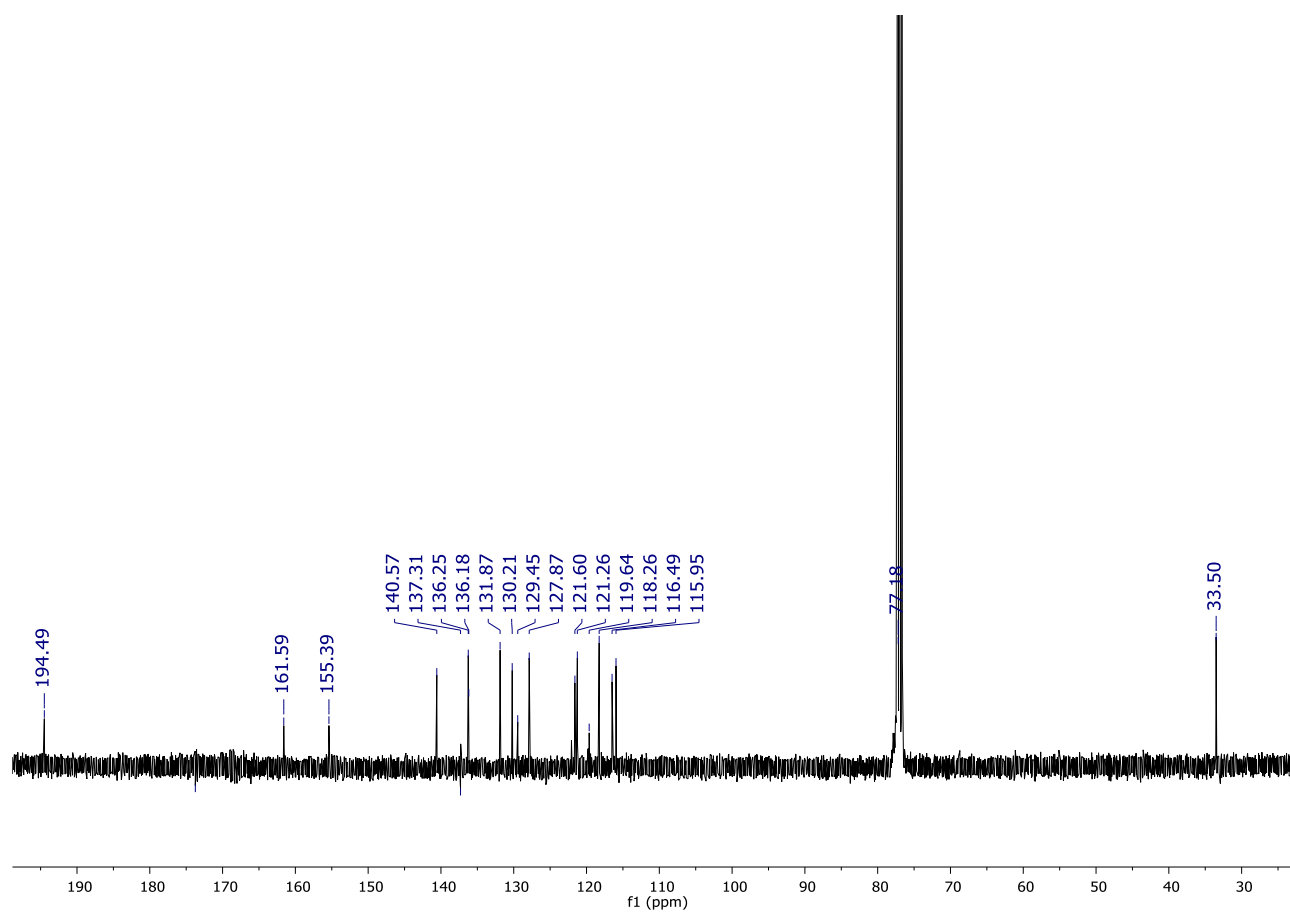

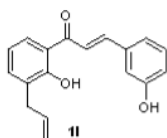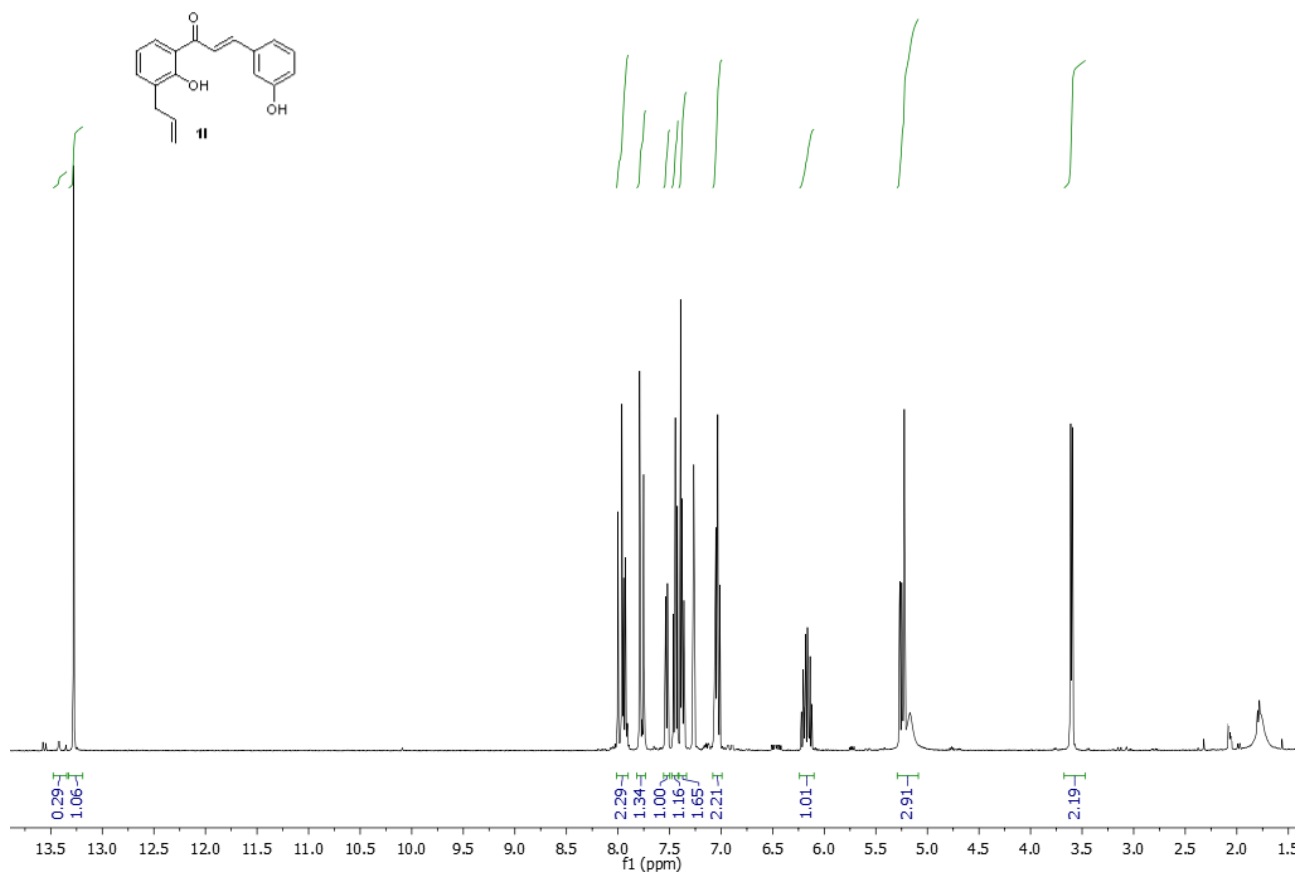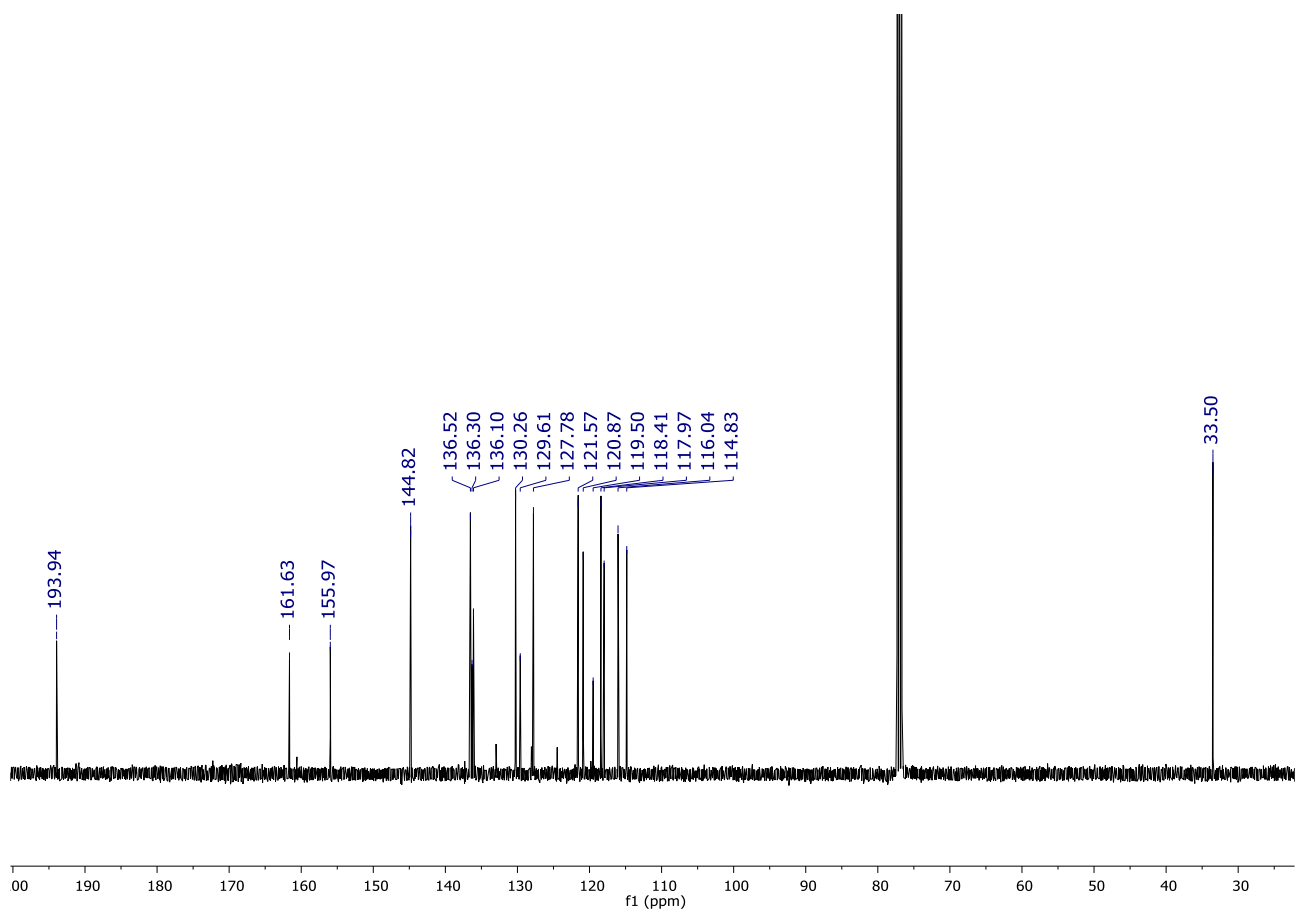

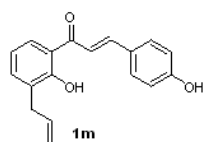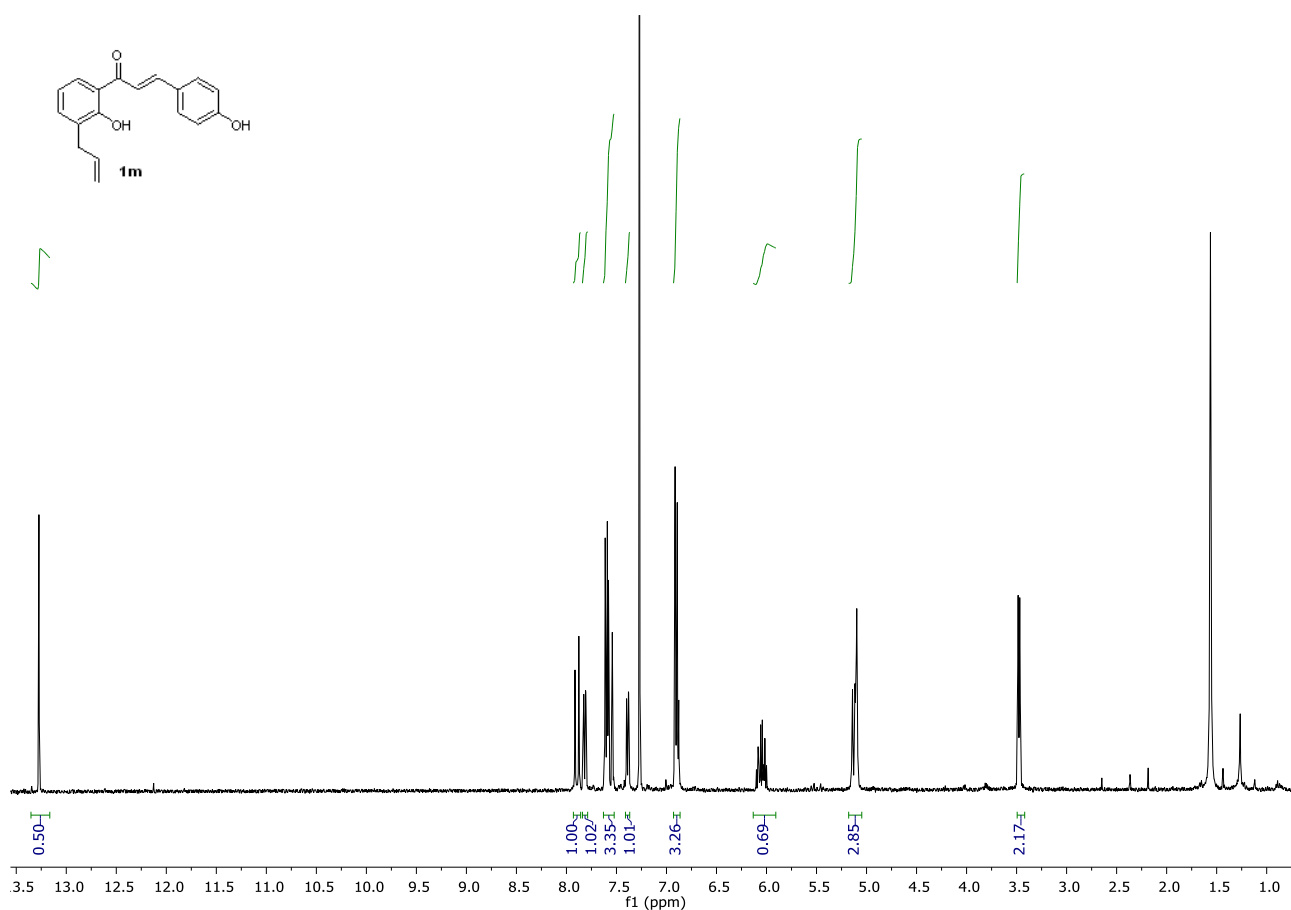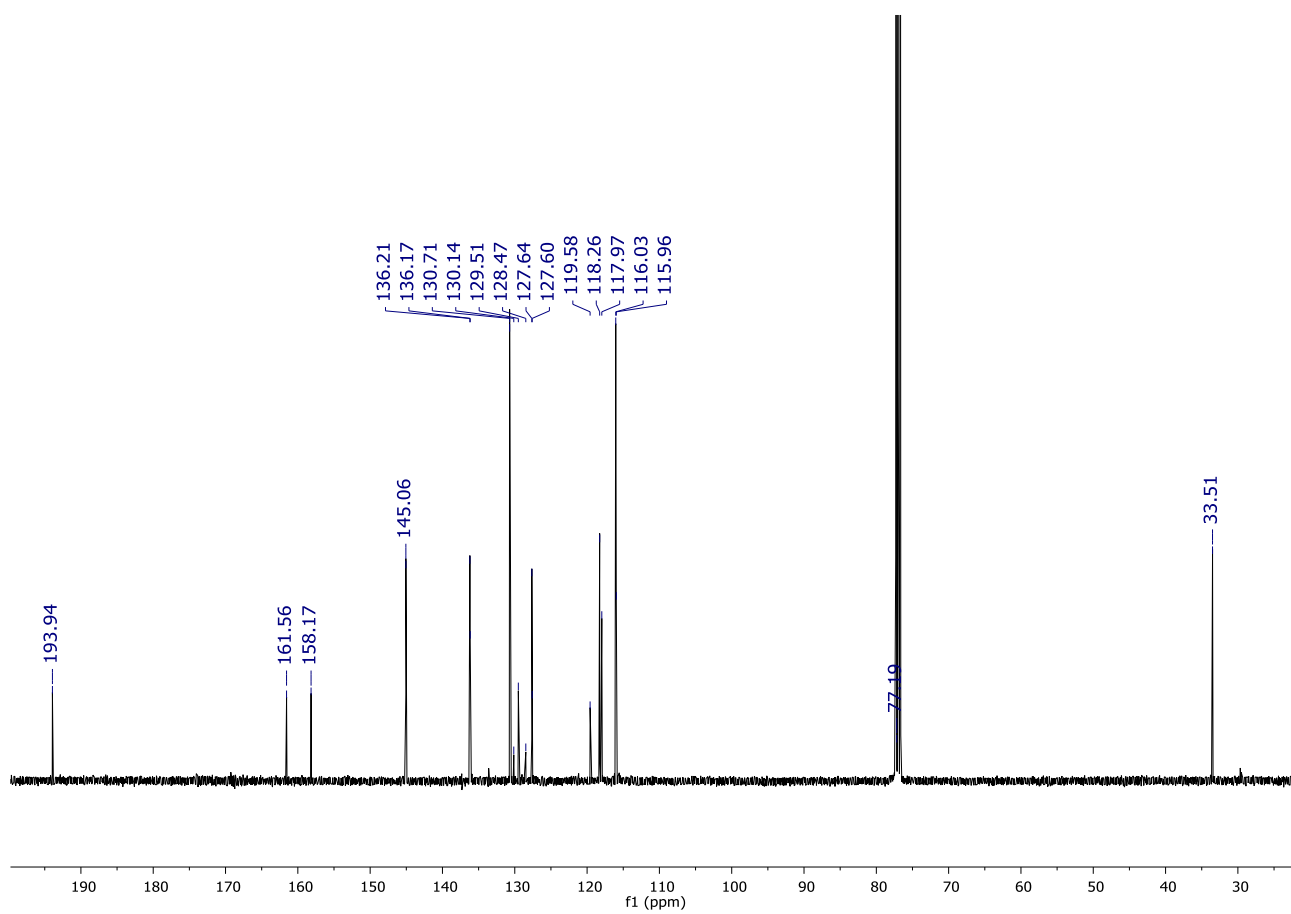

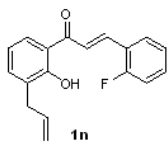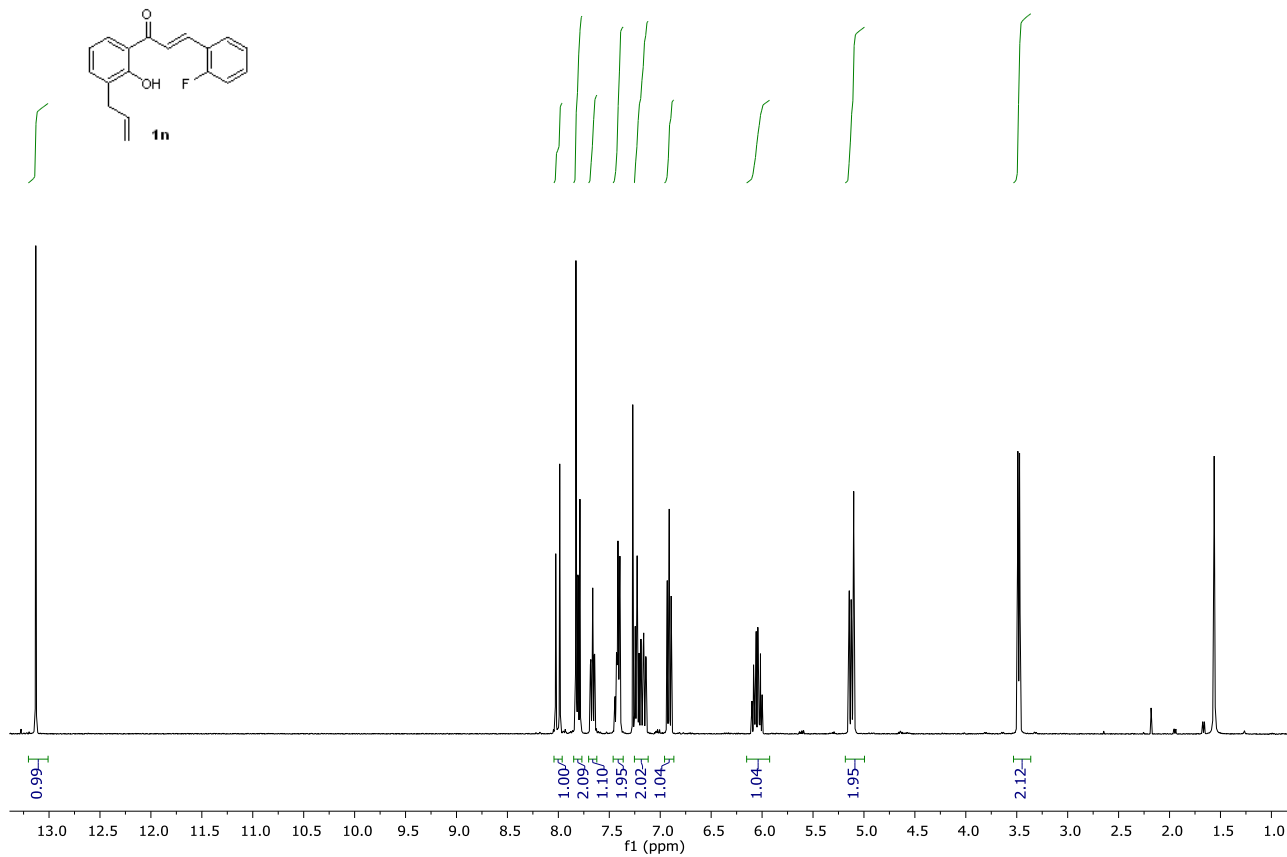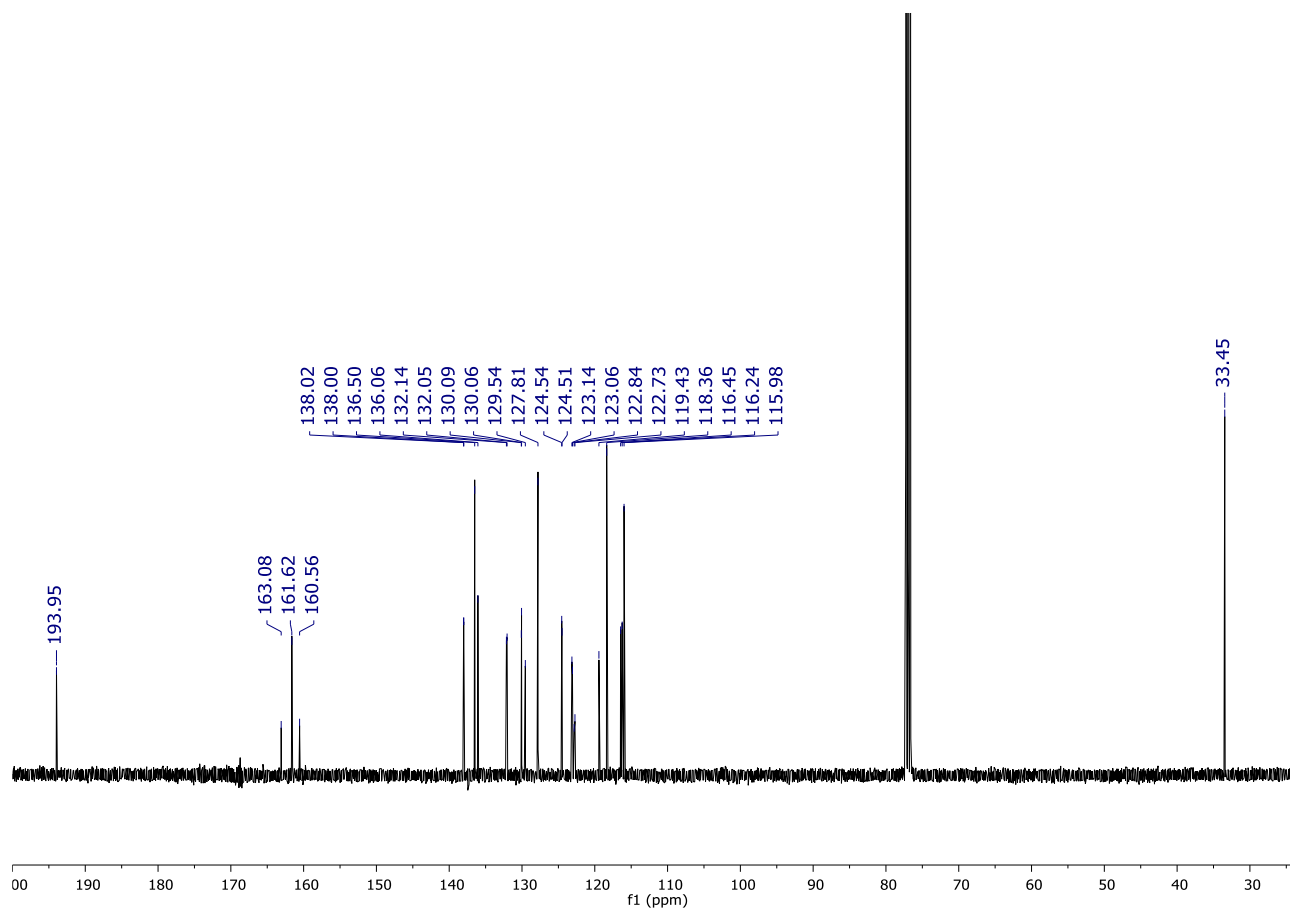



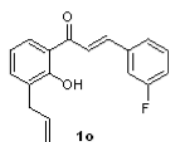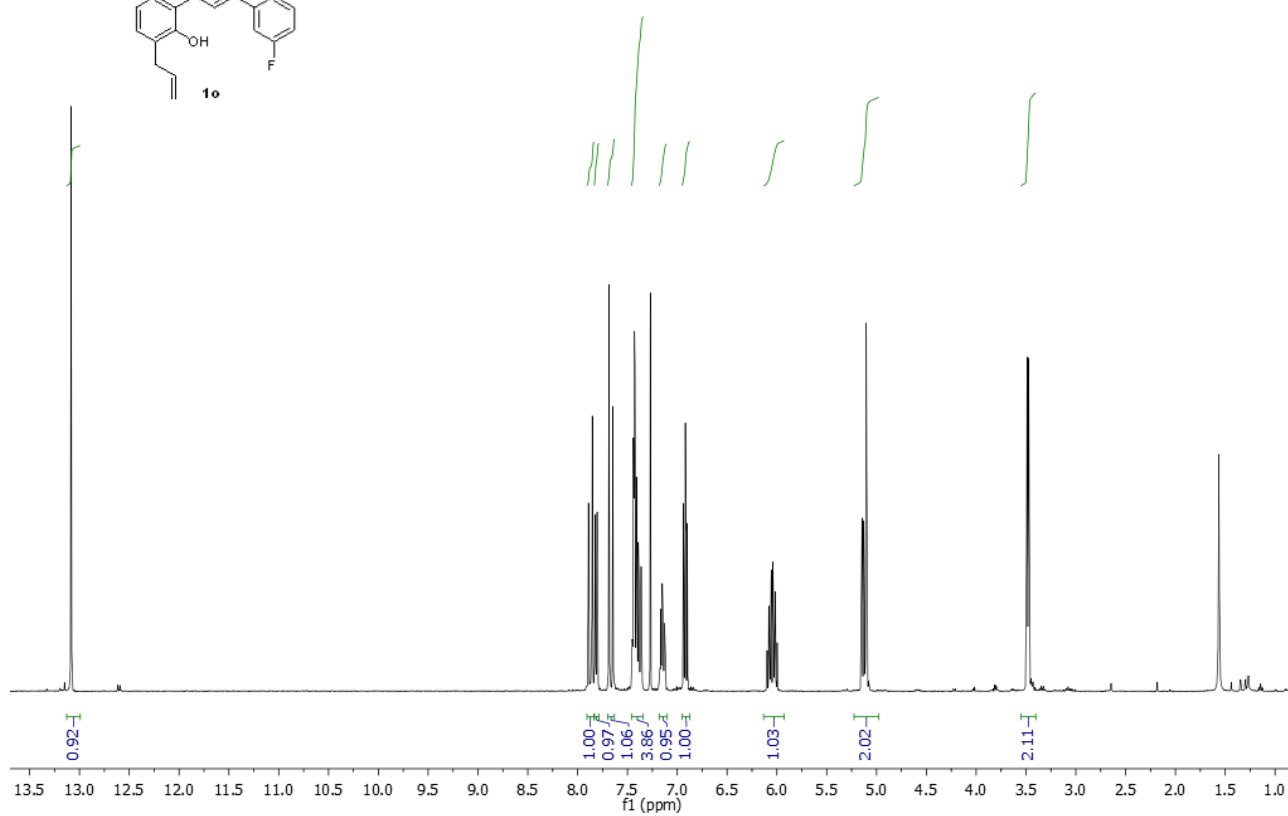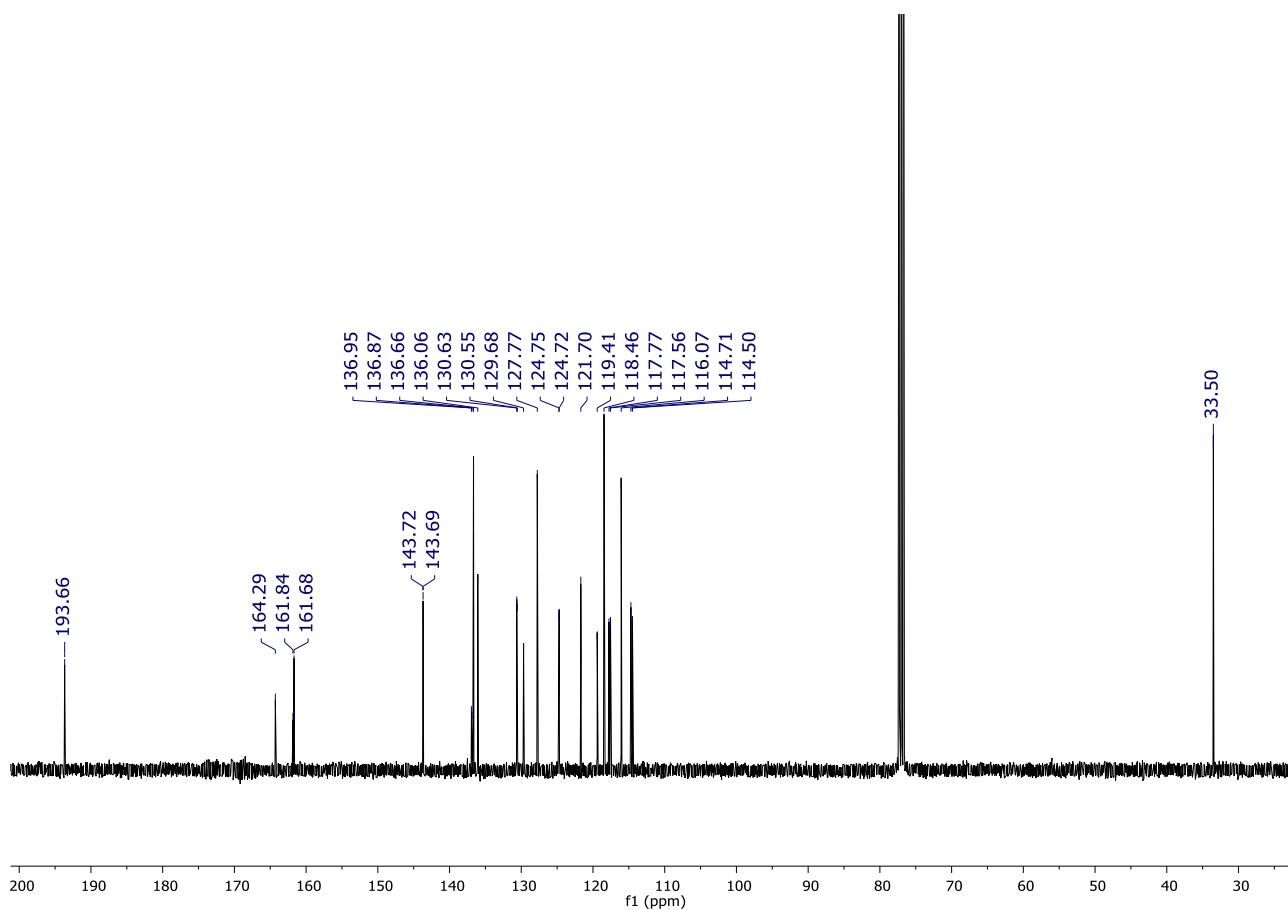

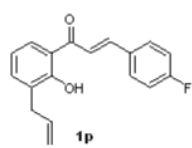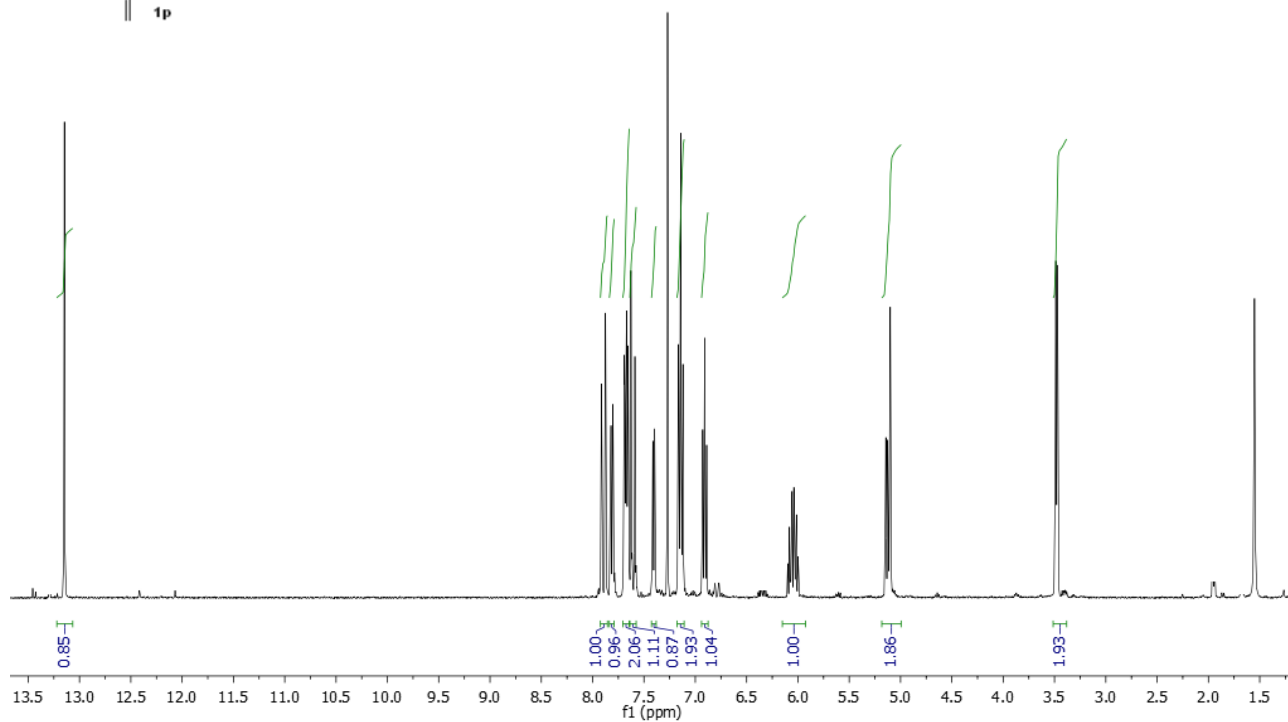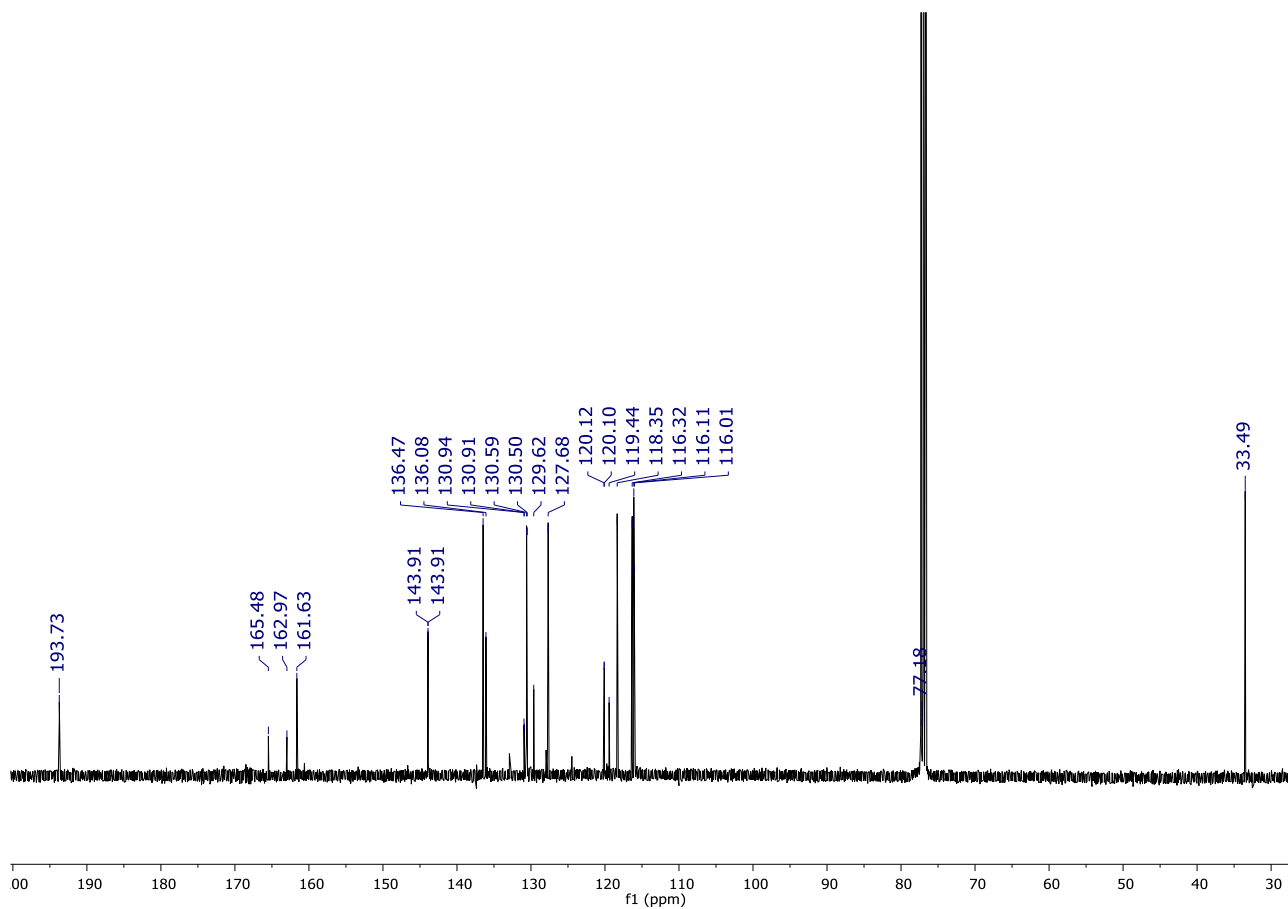

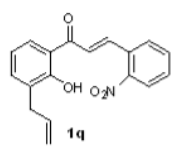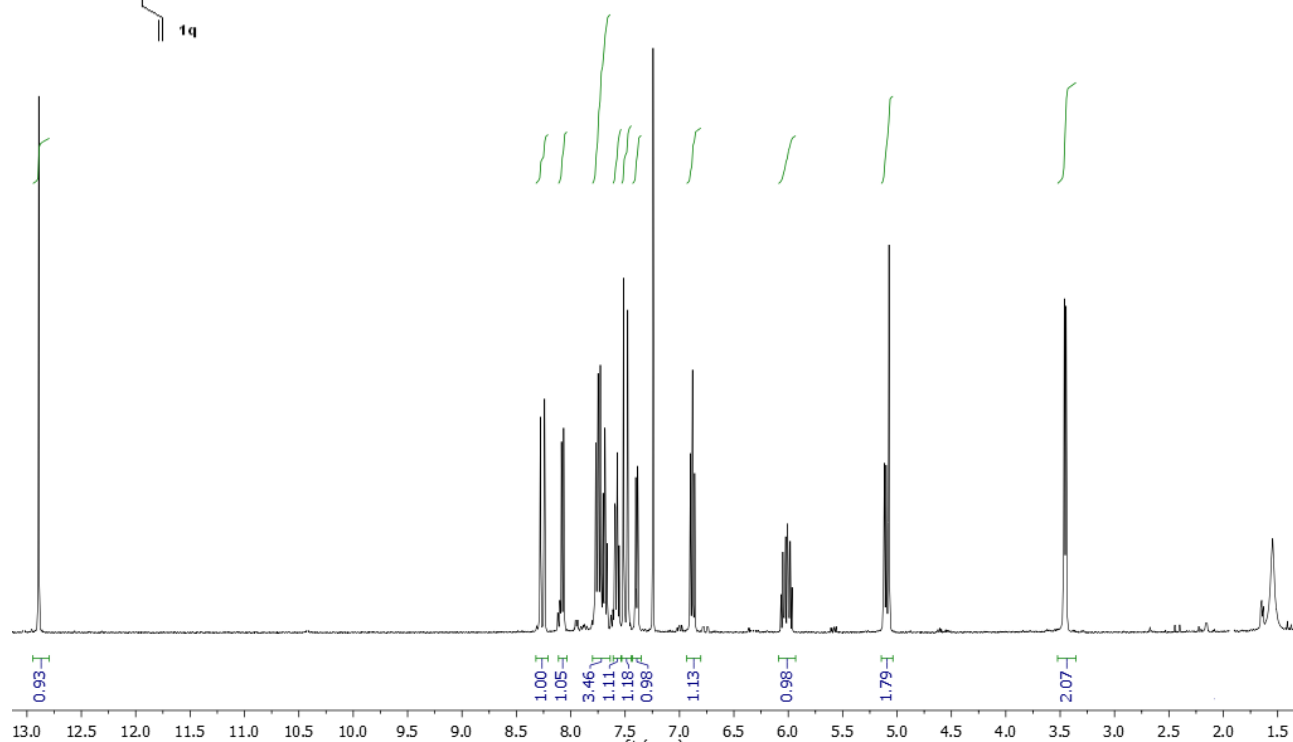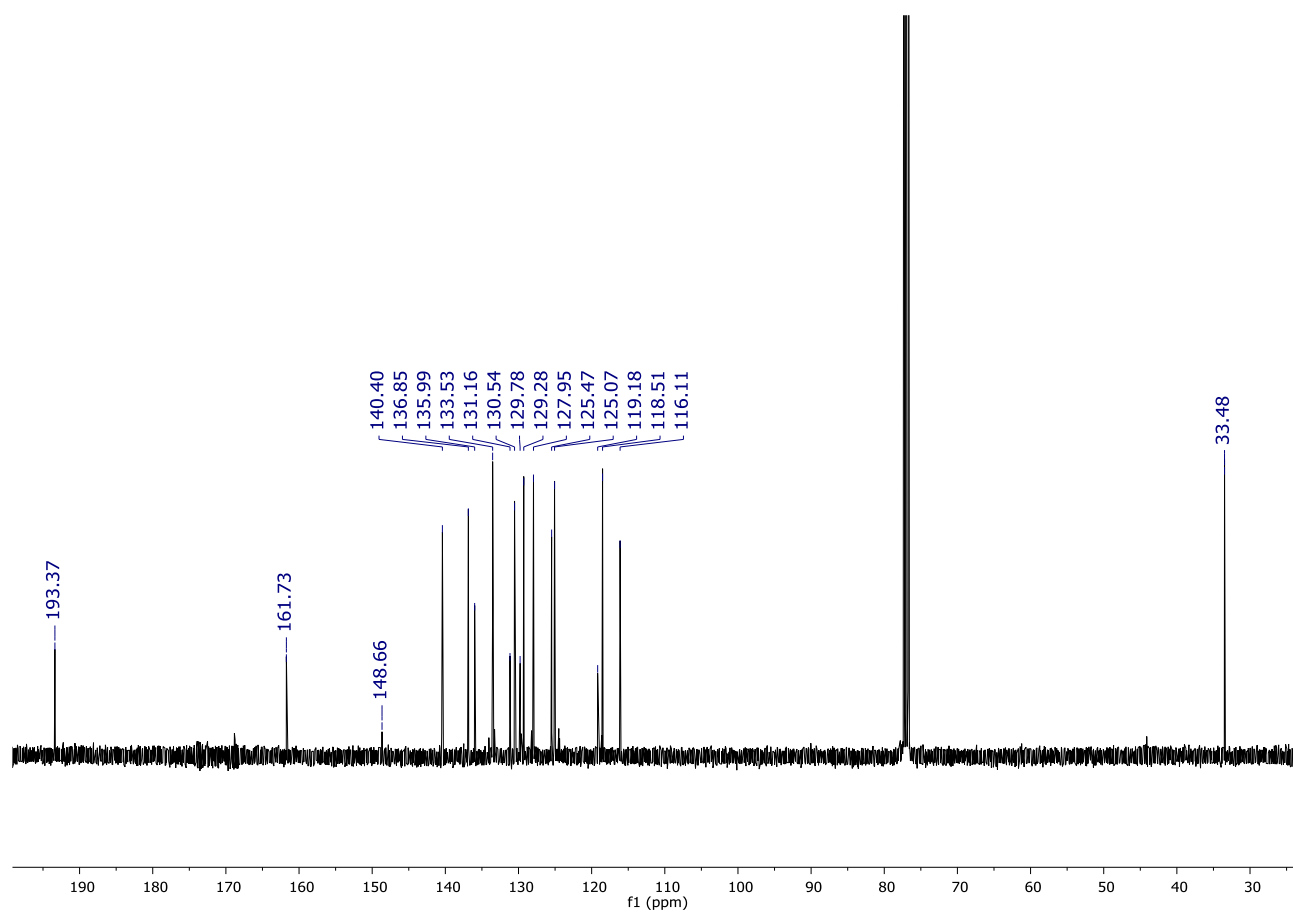

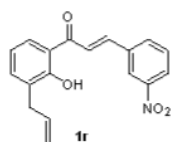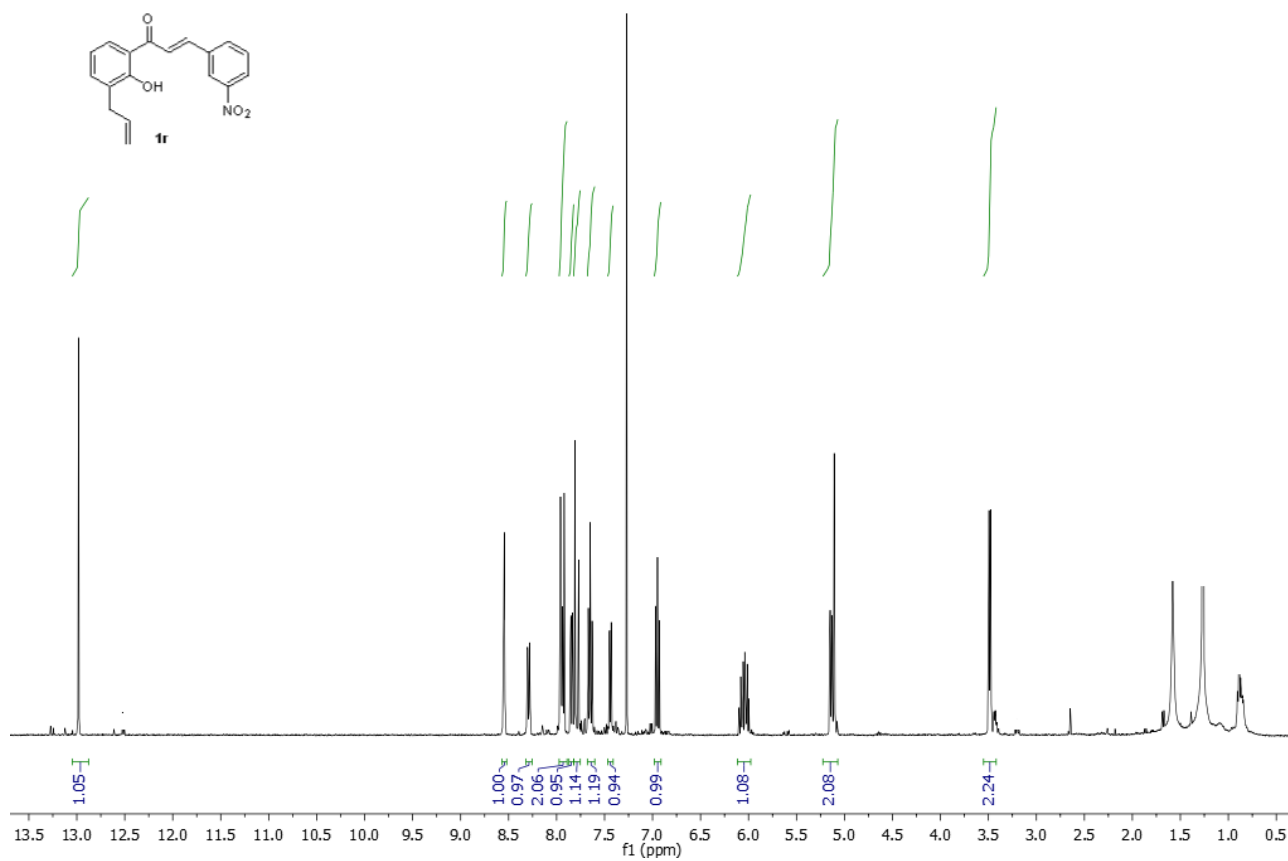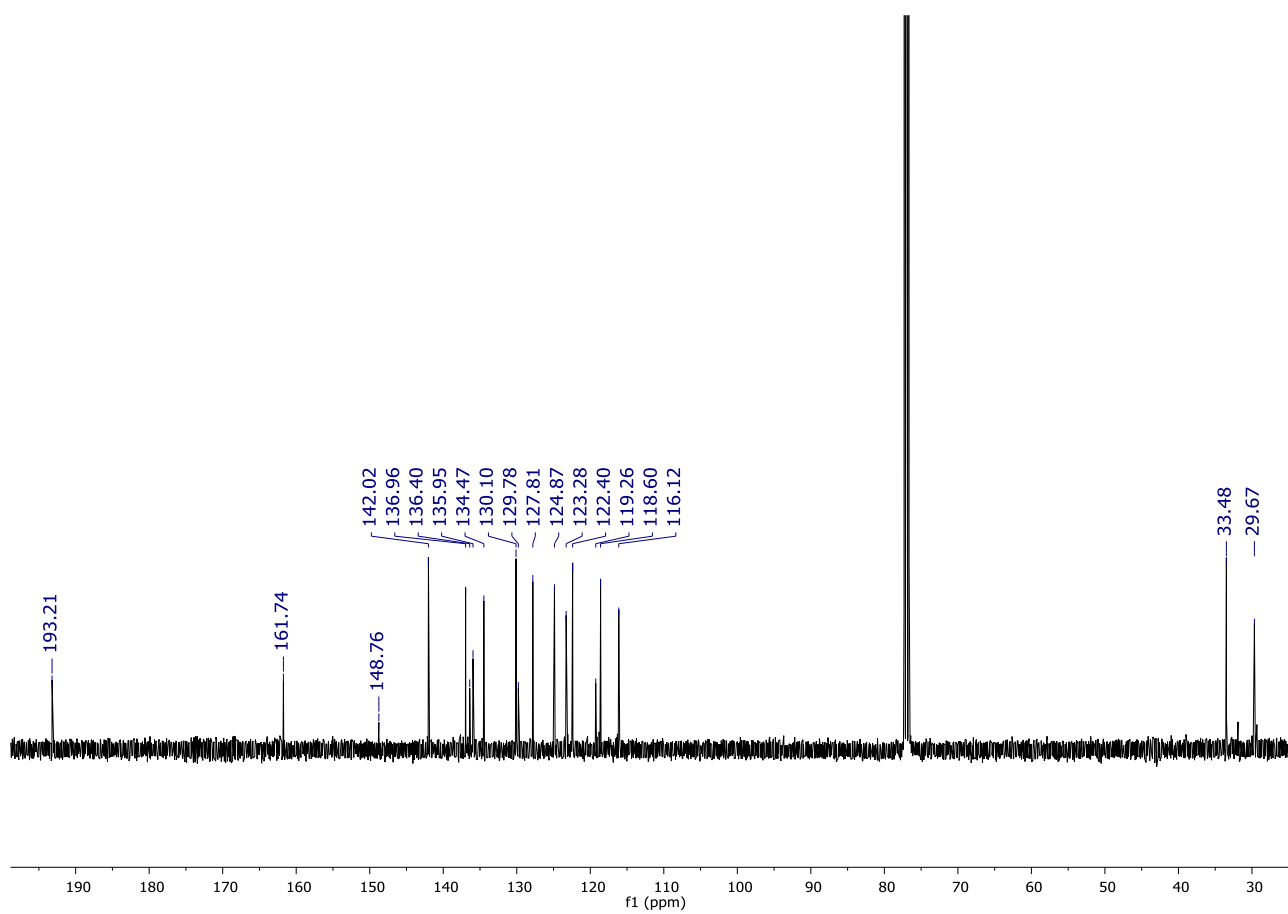

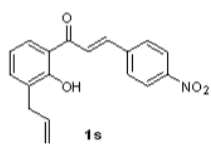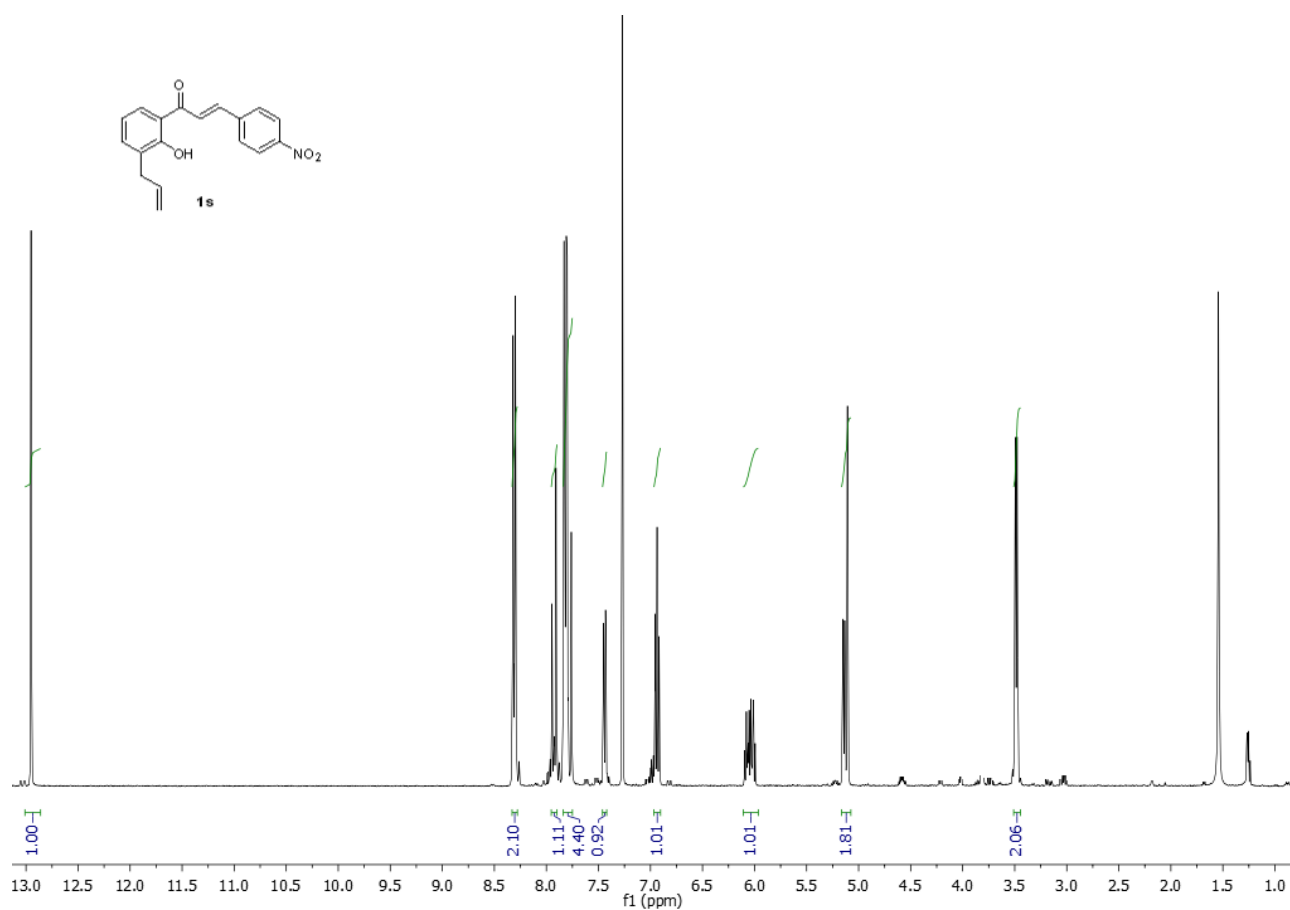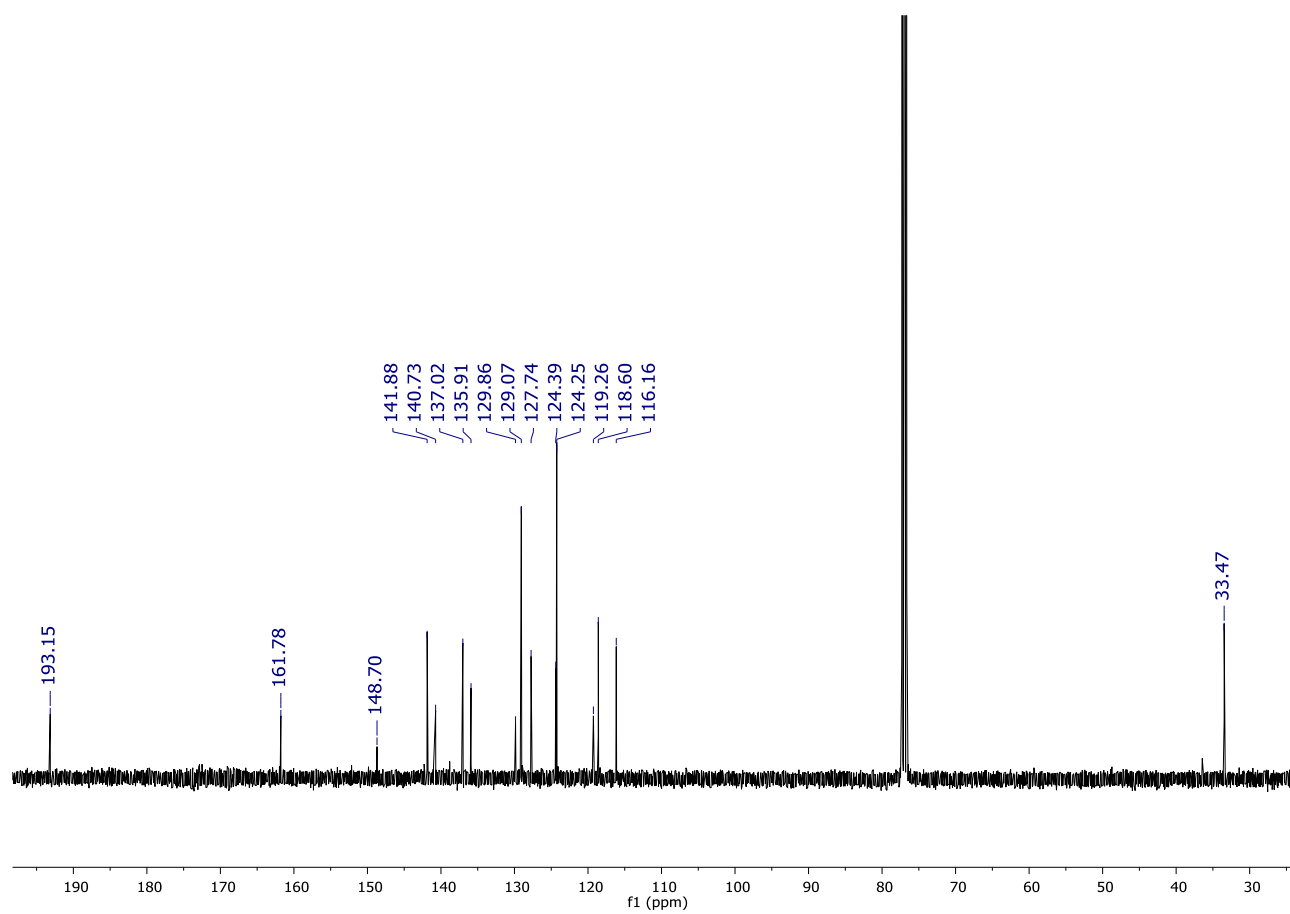

Supplement: s1 [file s1]
